# Supplementary material for: Salvianolic acid B inhibits RAW264.7 cell polarization towards the M1 phenotype by inhibiting NF-κB and Akt/mTOR pathway activation
Source: PubMed Central journal article supplement (PMC9381594; doi:10.1038/s41598-022-18246-0), 2022-08-16
Supplement: 41598_2022_18246_MOESM2_ESM.pdf [file 41598_2022_18246_MOESM2_ESM.pdf]

**Original uncropped images of western blots used for the experiment.**

**Figure 4A**

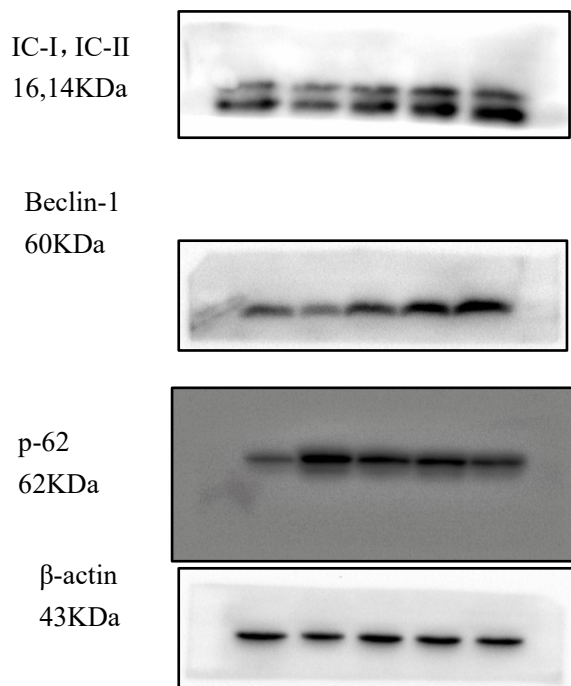

|                          |   |   |     |     |     |
|--------------------------|---|---|-----|-----|-----|
| LPS (100ng/mL)           | - | + | +   | +   | +   |
| INF- $\gamma$ (2.5ng/mL) | - | + | +   | +   | +   |
| Sal B ( $\mu$ M)         | - | - | 100 | 150 | 200 |

**Figure 4E**

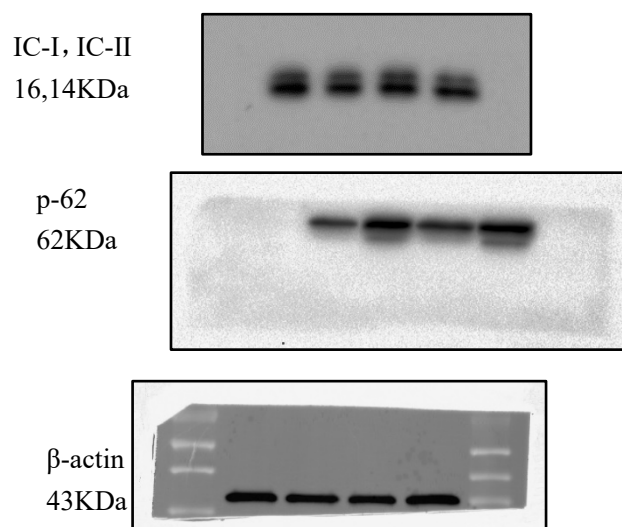

|                          |   |   |     |     |
|--------------------------|---|---|-----|-----|
| LPS (100ng/mL)           | - | + | +   | +   |
| INF- $\gamma$ (2.5ng/mL) | - | + | +   | +   |
| Sal B ( $\mu$ M)         | - | - | 200 | 200 |
| 3-MA (mM)                | - | - | -   | 5   |

**Figure 5A**

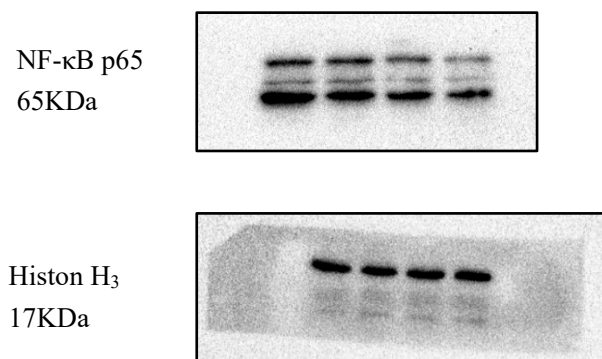

|                  |   |     |     |     |
|------------------|---|-----|-----|-----|
| Sal B ( $\mu$ M) | - | 100 | 150 | 200 |
|------------------|---|-----|-----|-----|

**Figure 5C**

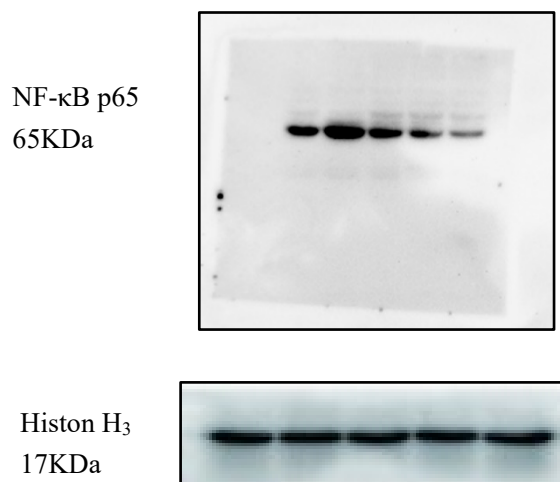

|                          |   |   |     |     |     |
|--------------------------|---|---|-----|-----|-----|
| LPS (100ng/mL)           | - | + | +   | +   | +   |
| INF- $\gamma$ (2.5ng/mL) | - | + | +   | +   | +   |
| Sal B ( $\mu$ M)         | - | - | 100 | 150 | 200 |

**Figure 5J**

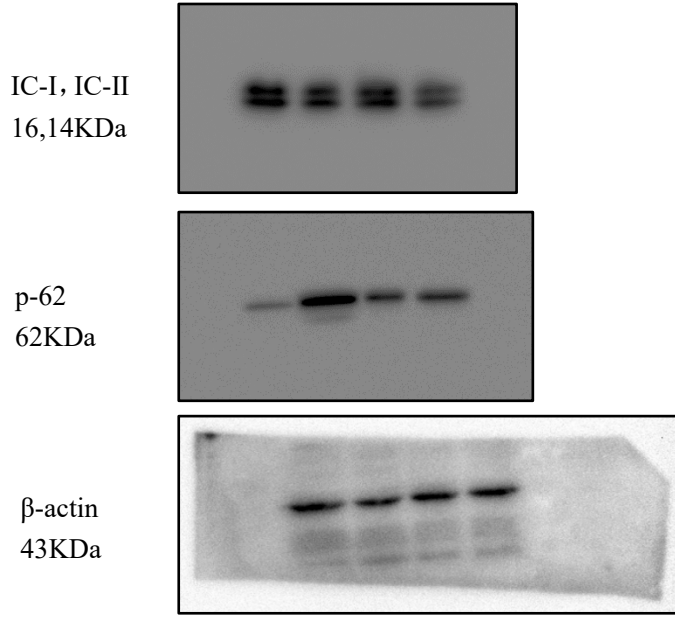

|                          |   |   |     |     |
|--------------------------|---|---|-----|-----|
| LPS (100ng/mL)           | - | + | +   | +   |
| INF- $\gamma$ (2.5ng/mL) | - | + | +   | +   |
| Sal B ( $\mu$ M)         | - | - | 200 | 200 |
| PMA (nmol/mL)            | - | - | -   | 5   |

**Figure 6A**

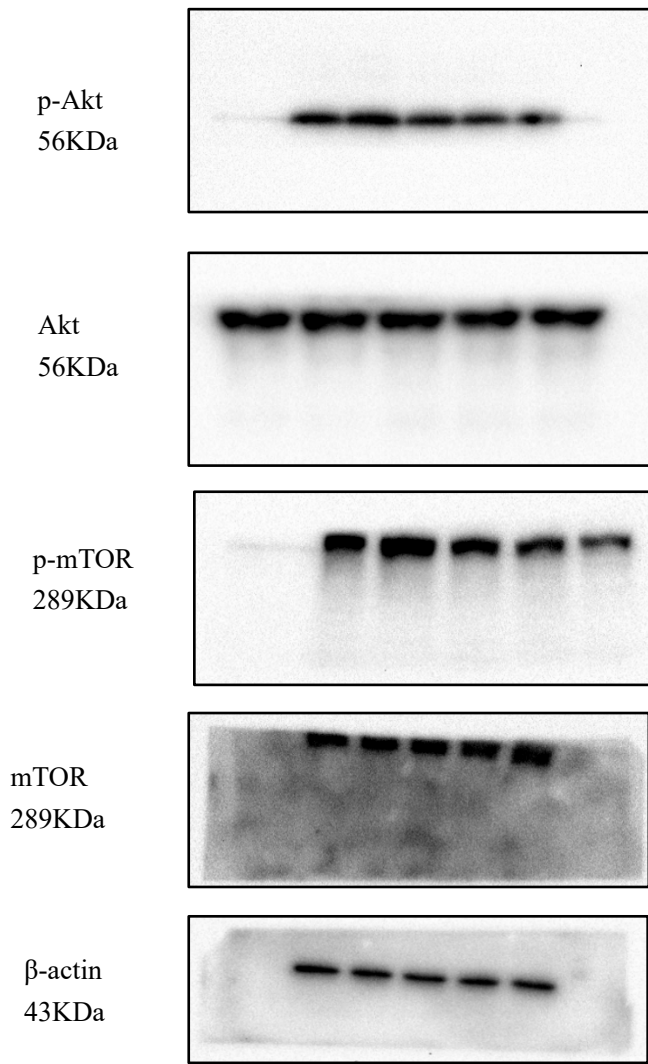

|                          |   |   |     |     |     |
|--------------------------|---|---|-----|-----|-----|
| LPS (100ng/mL)           | - | + | +   | +   | +   |
| INF- $\gamma$ (2.5ng/mL) | - | + | +   | +   | +   |
| Sal B ( $\mu$ M)         | - | - | 100 | 150 | 200 |

**Figure 6D**

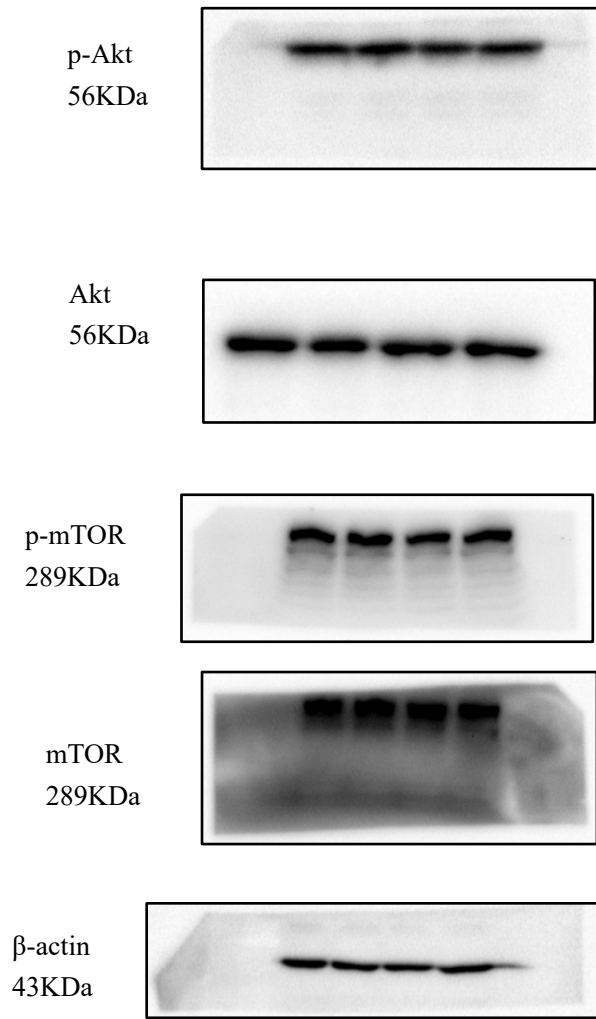

|                          |   |   |     |     |
|--------------------------|---|---|-----|-----|
| LPS (100ng/mL)           | - | + | +   | +   |
| INF- $\gamma$ (2.5ng/mL) | - | + | +   | +   |
| Sal B ( $\mu$ M)         | - | - | 200 | 200 |
| Insulin ( $\mu$ g/mL)    | - | - | -   | 5   |
